# Supplementary material
Source: PubMed Central journal article supplement (PMC9873727)
Supplement: 42003_2023_4478_MOESM2_ESM.pdf [file 42003_2023_4478_MOESM2_ESM.pdf]

1 **Supplementary information (Figures and Tables)**

2 **Supplementary Figure 1:**

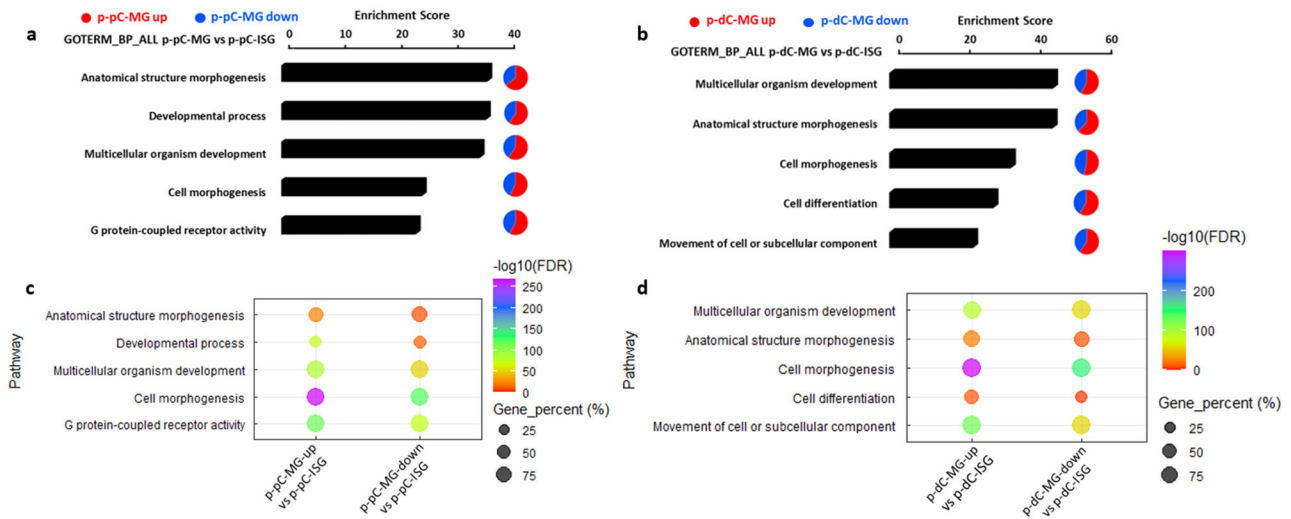

3

4 **Supplementary Fig. 1** Comparison of pathway enrichment between myenteric ganglia (MG) and inner

5 submucosal ganglia (ISG) in porcine proximal or distal colon (p-pC, p-dC). a, b Enrichment of top five

6 biological processes (BPs). The pie charts show the percentage of visible genes involved in the specified

7 BPs. Red and blue color represents the genes with upregulated and downregulated expression levels in MG

8 in comparison with ISG, respectively. X-axis marks enrichment score, with the significance cut-off marked

9 by the vertical white line ( $p$ -value < 0.05). c, d The bubble plots show the gene percentage and enrichment

10 of the top BPs. Circle size represents the ratio of the number of pathway-specific differentially expressed

11 genes (DEG) and the number of total DEG in each DEG list (Gene\_percent). Color represents a  $-\log_{10}(\text{FDR})$

12 distribution from big (orange) to small (purple). Up, upregulated expression. Down,

13 downregulated expression.

14

15

16

17

18

19

20

21 **Supplementary Figure 2:**

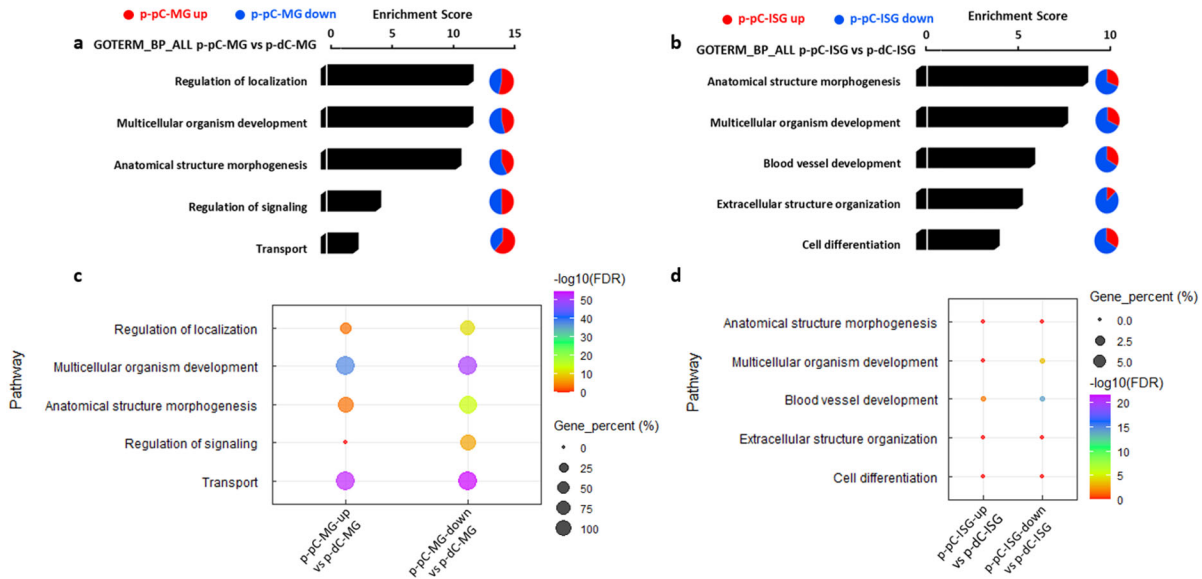

22

23 **Supplementary Fig. 2** Comparison of pathway enrichment in myenteric ganglia (MG) or inner submucosal  
 24 ganglia (ISG) between porcine proximal and distal colon (p-pC, p-dC). a, b Enrichment of top five  
 25 biological processes (BPs). The pie charts show the percentage of visible genes involved in the specified  
 26 BPs. Red and blue color represents the genes with upregulated and downregulated expression levels in p-  
 27 pC-MG or p-pC-ISG in comparison with p-dC-MG or p-dC-ISG, respectively. X-axis marks enrichment  
 28 score, with the significance cut-off marked by the vertical white line ( $p$ -value < 0.05). c, d The bubble plots  
 29 show the gene percentage and enrichment of the top BPs. Circle size represents the ratio of the number of  
 30 pathway-specific differentially expressed genes (DEG) and the number of total DEG in each DEG list  
 31 (Gene\_percent). Color represents a  $-\log_{10}(\text{FDR})$  distribution from big (orange) to small (purple). Up,  
 32 upregulated expression. Down, downregulated expression.

33

34

35

36

37

38

39

40 **Supplementary Figure 3:**

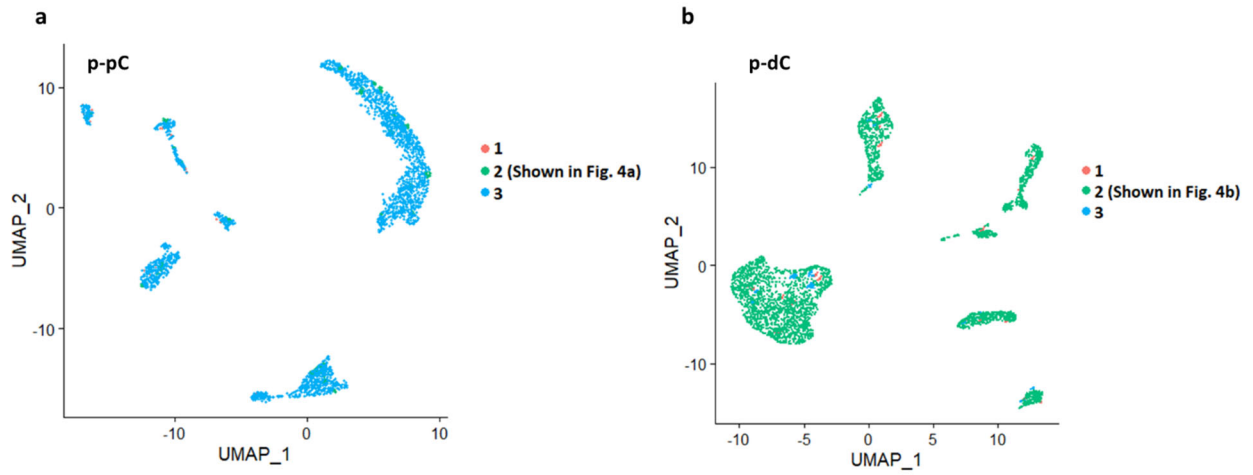

58 **Supplementary Figure 4:**

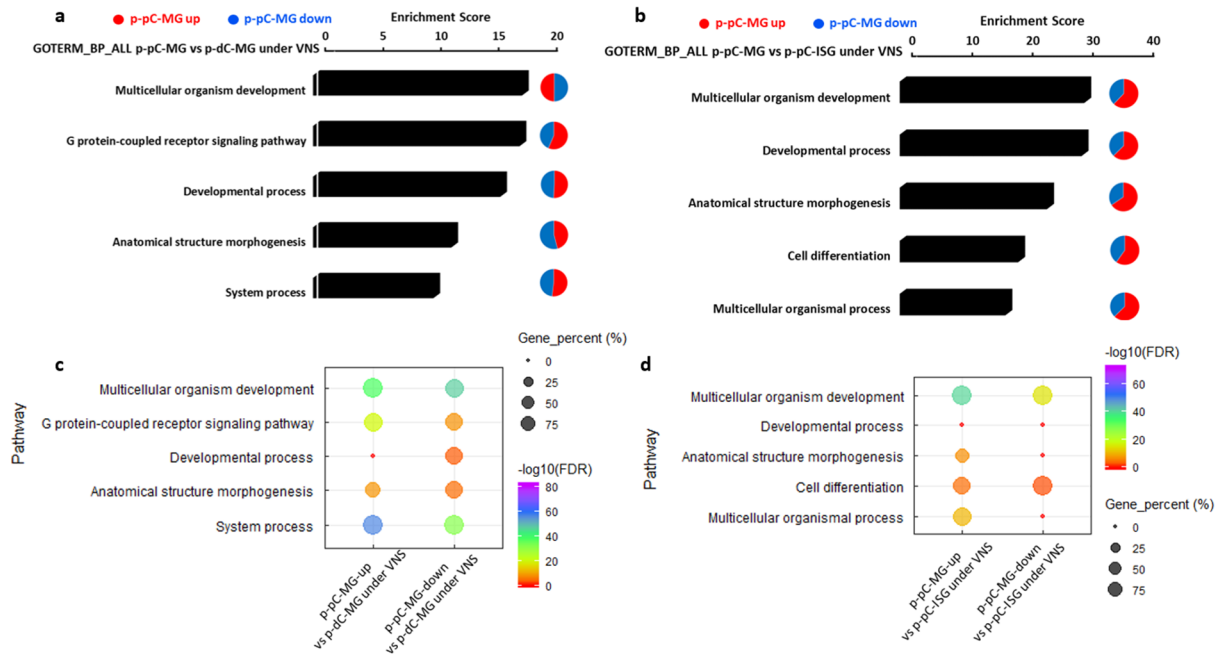

59

60 **Supplementary Fig. 4** Comparison of pathway enrichment in myenteric ganglia (MG) between porcine  
 61 proximal and distal colon (p-pC, p-dC) and between p-pC-MG and inner submucosal ganglia (ISG) in p-  
 62 pC with vagal nerve stimulation (VNS). a, b Enrichment of top five biological processes (BPs). The pie  
 63 charts show the percentage of visible genes involved in the specified BPs. Red and blue color represents  
 64 the genes with upregulated and downregulated expression levels in p-pC-MG in comparison with p-dC-  
 65 MG or p-pC-ISG, respectively. X-axis marks enrichment score, with the significance cut-off marked by the  
 66 vertical white line ( $p$ -value < 0.05). c, d The bubble plots show the gene percentage and enrichment of the  
 67 top BPs. Circle size represents the ratio of the number of pathway-specific differentially expressed genes  
 68 (DEG) and the number of total DEG in each DEG list (Gene\_percent). Color represents a  $-\log_{10}(\text{FDR})$   
 69 distribution from big (orange) to small (purple). Up, upregulated expression. Down, downregulated  
 70 expression.

71

72

73

74

75

76 **Supplementary Figure 5:**

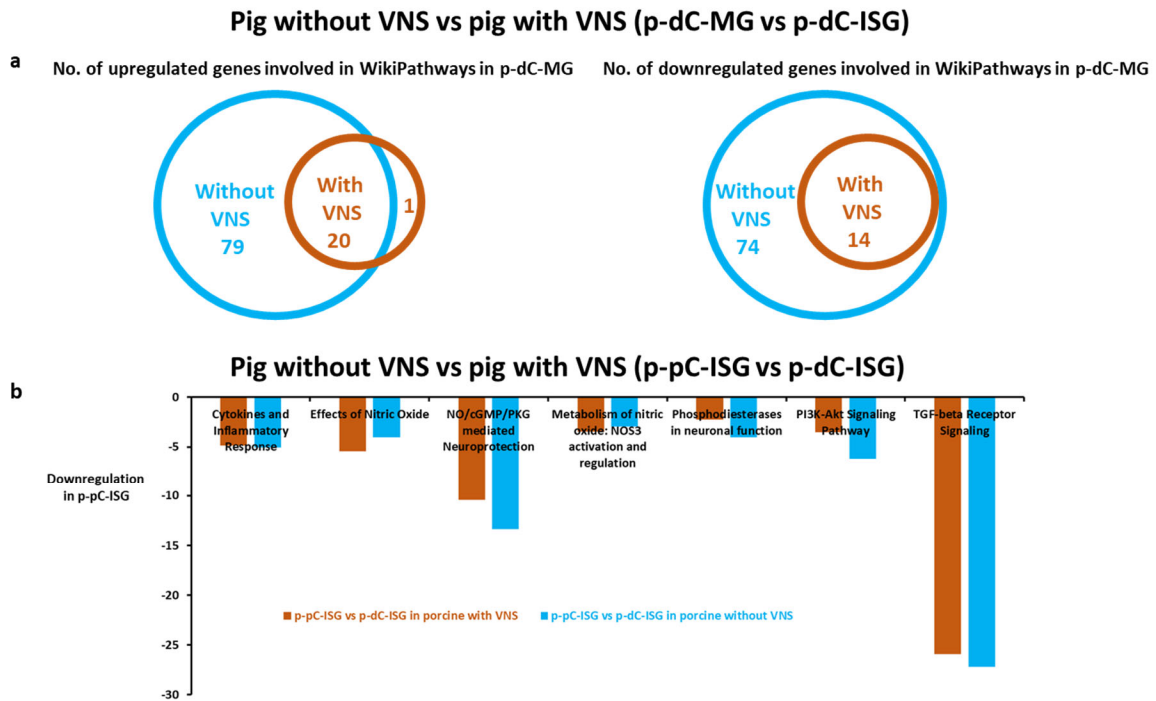

77

78 **Supplementary Fig. 5** Comparison of pathway enrichment between myenteric ganglia (MG) and inner  
 79 submucosal ganglia (ISG) in porcine distal colon (p-dC) (a) and between ISG in proximal colon (p-pC) and  
 80 p-dC-ISG (b) with and without vagal nerve stimulation (VNS). The Venn diagram illustrates the numbers  
 81 of the differentially expressed genes involved in WikiPathways (a) and the bar graph shows the difference  
 82 in WikiPathways enrichment (b). The light blue color represents the difference without VNS and the orange  
 83 color represents the difference with VNS. Fig. b shows the enrichment ratio of the same WikiPathway  
 84 involving upregulated and downregulated genes in each list of differentially expressed genes based on the  
 85 bulk RNA sequencing data. The light blue bars represent the enrichment ratio without VNS and the orange  
 86 bars represent the enrichment ratio with VNS.

87

88

89

90

91

92

93 **Supplementary Figure 6:**

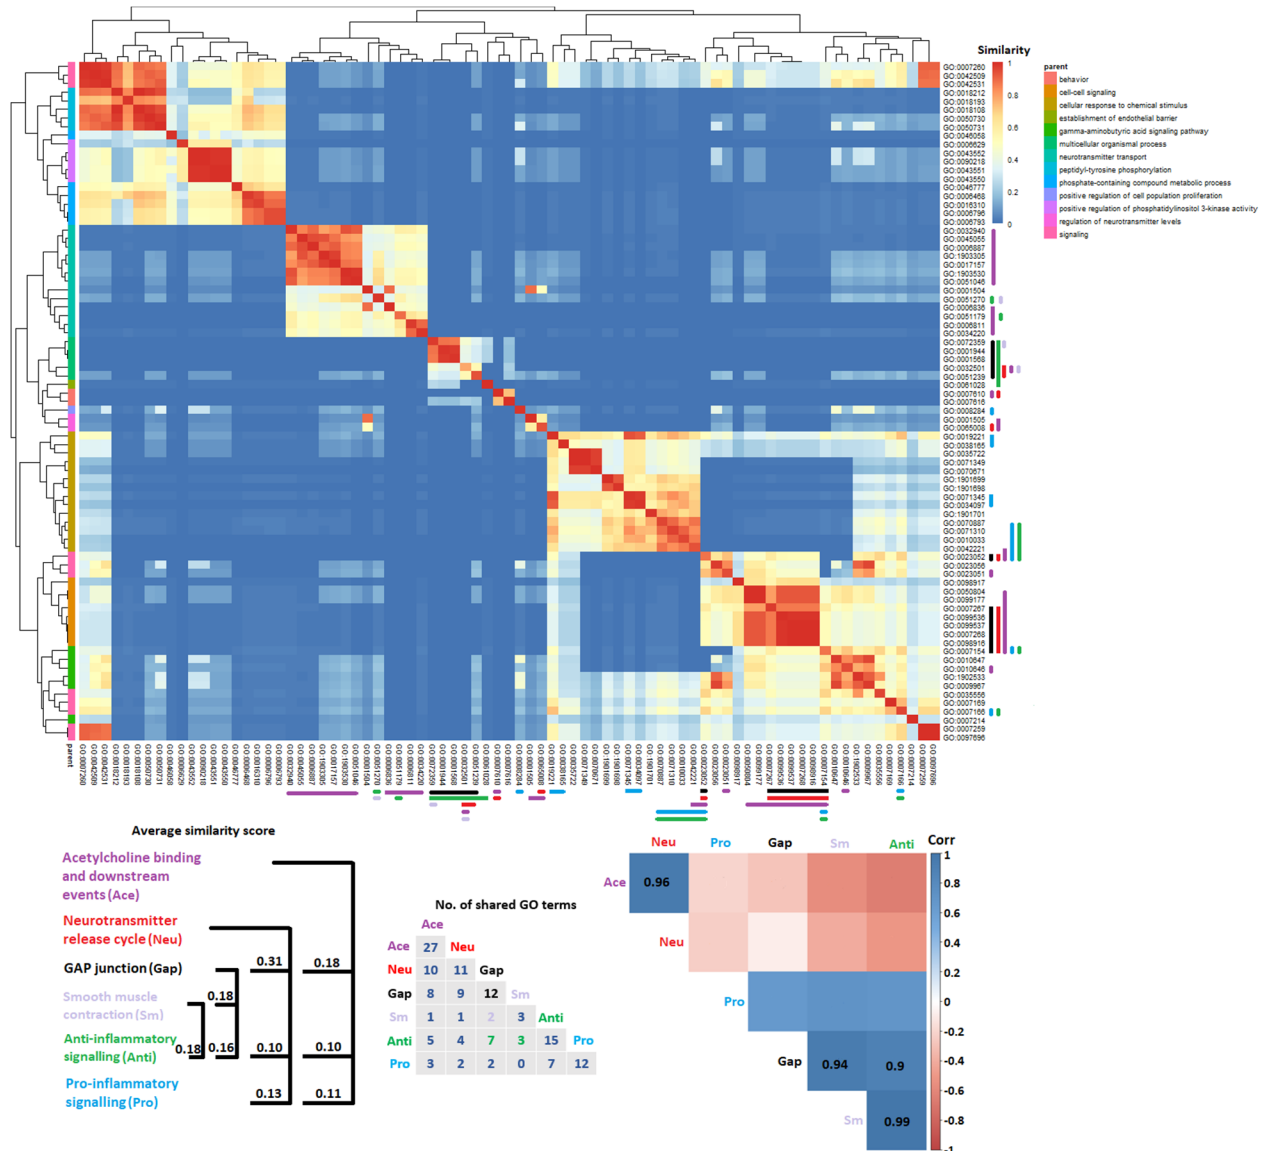

94

95 **Supplementary Fig. 6** Heatmap represents the similarity matrix between Gene Ontology (GO) terms in  
 96 comparison of myenteric ganglia (MG) and inner submucosal ganglia (ISG) in porcine proximal colon (p-  
 97 pC) with vagal nerve stimulation (VNS). Only biological processes were selected for the analysis. Color  
 98 represents a similarity distribution from big (red) to small (blue). The child GO terms were defined in a  
 99 number of parent terms and WikiPathways of interest. The number of shared GO terms between  
 100 WikiPathways of interest and average similarity score between the WikiPathways were also summarized.  
 101 Pearson correlation analysis was performed based on pathway enrichment scores. Color represents a  
 102 correlation distribution from positive (blue) to negative (red). The insignificant correlations were left blank.  
 103 The color bars represent the specified child GO terms classified into designated clusters.

104 **Supplementary Figure 7:**

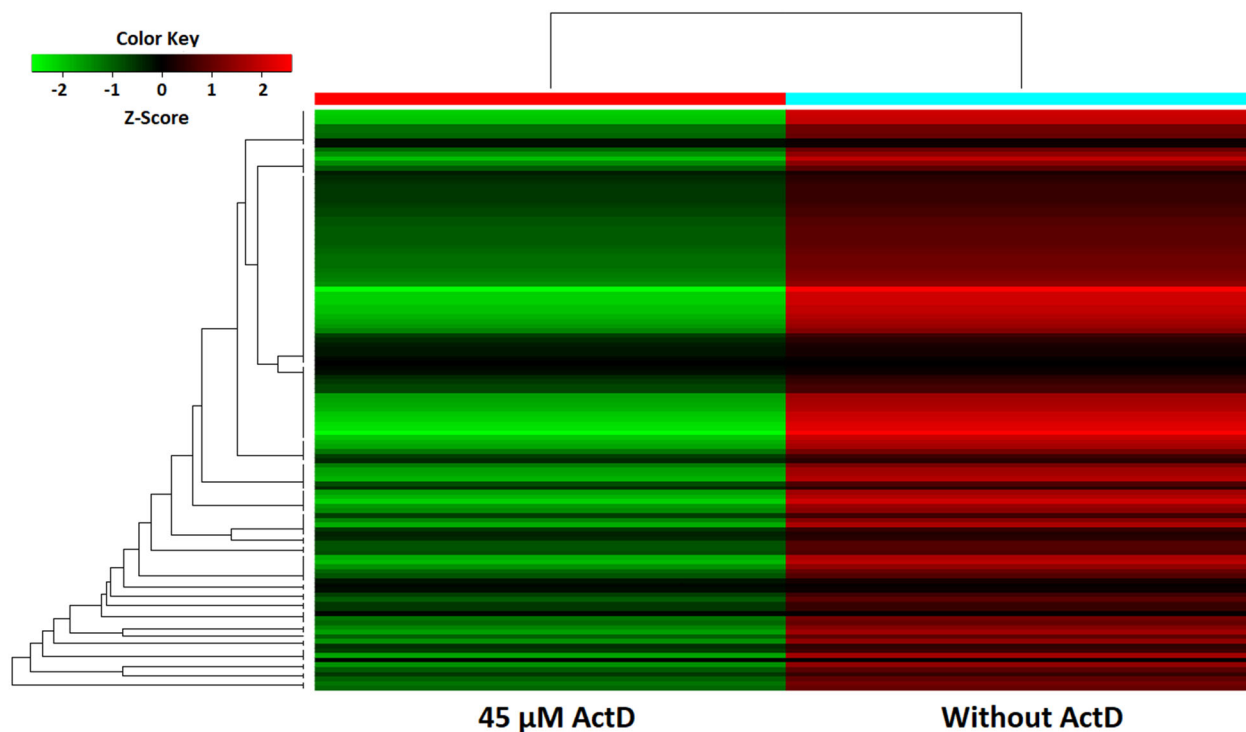

105  
106 **Supplementary Fig. 7** Heatmap showing that addition of Actinomycin D (ActD) suppresses artificially  
107 induced expression levels of immediate-early genes (IEGs) during single-cell dissociation. After cell  
108 suspension preparation from muscularis externa of porcine proximal colon, more than 1 million cells per  
109 sample were collected for bulk RNA-seq. The expression levels of total 127 IEGs were extracted. The gene  
110 expression was  $\log_2$  transformed and was displayed as colors ranging from red (high) to green (low) as  
111 shown in the key.

112  
113  
114  
115  
116  
117  
118  
119

120 **Supplementary Table 1:**

121 **Receptors and ligands expressed in neuronal and glial subsets**

| Receptor                     | Ligand                       |
|------------------------------|------------------------------|
| AGTR1/Cholinergic neurons    | VEGFA/ Nitroergic neurons    |
| AGTR1/Cholinergic neurons    | ALB/SLC41A1_Glia             |
| ITGB1/Cholinergic neurons    | VEGFA/ Nitroergic neurons    |
| ITGB1/Cholinergic neurons    | ALB/SLC41A1_Glia             |
| ITGB1/Cholinergic neurons    | SPP1/SLC41A1_Glia            |
| ITGB1/Cholinergic neurons    | TGFB3/SLC41A1_Glia           |
| LDLR/Cholinergic neurons     | CLU/SPC24_Glia               |
| LDLR/Cholinergic neurons     | ALB/SLC41A1_Glia             |
| VCL/Cholinergic neurons      | ALB/SLC41A1_Glia             |
| GPC4/Glutamatergic neurons   | PCOLCE2/ Cholinergic neurons |
| LEPR/Glutamatergic neurons   | IL7/SLC41A1_Glia             |
| LEPR/Glutamatergic neurons   | IGF1/SLC41A1_Glia            |
| TGFBRI/Glutamatergic neurons | TGFB3/SLC41A1_Glia           |
| ACVR2B/ Nitroergic neurons   | TGFB3/SLC41A1_Glia           |
| ACVR2B/ Nitroergic neurons   | IGF1/SLC41A1_Glia            |
| GNG8/ Nitroergic neurons     | C5/SLC41A1_Glia              |
| ANPEP/SPC24_Glia             | ALB/SLC41A1_Glia             |
| ANPEP/SPC24_Glia             | VEGFA/ Nitroergic neurons    |
| CALCRL/SLC41A1_Glia          | VEGFA/ Nitroergic neurons    |

122

123

124

125

126

127

128

129

130

131

132



133 **Supplementary Table 2**134 **Coverage of functional linkages involving top five WikiPathways in the investigated cell types**

| Comparisons                                    | Key DEG involved in the top five WikiPathways in the investigated cell types                                                           | Proportion of functional linkages involving the key DEG to those involving all DEG (%) |
|------------------------------------------------|----------------------------------------------------------------------------------------------------------------------------------------|----------------------------------------------------------------------------------------|
| p-pC-MG up vs p-dC-MG in porcine without VNS   | <i>MAPK3, PRKX, LDLR</i>                                                                                                               | 90.11                                                                                  |
| p-pC-MG down vs p-dC-MG in porcine without VNS | <i>GNG8, CXCL12, GUCY1A1, TGFBR3</i>                                                                                                   | 98.84                                                                                  |
| p-pC-MG up vs p-dC-MG in porcine with VNS      | <i>CLTB, DAB2, MAPK3, NFKBIB, LYN, BCAR1, GRK5, PIK3CB, PRKX, GRK6, PTK2B, STAT1, EGRI, OSMR, LDLR, VEGFA, IL6ST, JAK1, ENG, TGIF1</i> | 97.38                                                                                  |
| p-pC-MG down vs p-dC-MG in porcine with VNS    | <i>TJP1, CXCL12, PIK3R1, TGFBR3, BMP4</i>                                                                                              | 98.65                                                                                  |

135 **Note:** p-pC-MG and p-dC-MG, myenteric ganglia in porcine proximal and distal colon, respectively; VNS, vagal nerve stimulation; up, upregulated  
 136 expression; down, downregulated expression; DEG, differentially expressed gene.

137

138

139

140

141

142

143

144

145

146

147

148

149

150

151

152 **Supplementary Table 3**

153 **Categories for the WikiPathways of interest**

| Synaptic plasticity                                                     | Neurotransmitter binding                                                | Interactions between immune cells and neurons         | Neuroprotection                      | Nitric Oxide                                               | Neuroinflammation          | Anti-inflammation           | Cytokine production         | Neurogenesis              |
|-------------------------------------------------------------------------|-------------------------------------------------------------------------|-------------------------------------------------------|--------------------------------------|------------------------------------------------------------|----------------------------|-----------------------------|-----------------------------|---------------------------|
| Synaptic Vesicle Pathway                                                | Synaptic Vesicle Pathway                                                | Oncostatin M Signaling Pathway                        | NO/cGMP/PKG mediated Neuroprotection | Effects of Nitric Oxide                                    |                            | TGF-beta Receptor Signaling | Chemokine signaling pathway | Dopaminergic Neurogenesis |
| Glutamate binding, activation of AMPA receptors and synaptic plasticity | Glutamate binding, activation of AMPA receptors and synaptic plasticity | Cytokines and Inflammatory Response                   |                                      | Metabolism of nitric oxide: NOS3 activation and regulation |                            |                             |                             |                           |
| Neurotransmitter receptors and postsynaptic signal transmission         | Neurotransmitter receptors and postsynaptic signal transmission         | COVID-19 Adverse Outcome Pathway                      |                                      | PI3K-Akt Signaling Pathway                                 | PI3K-Akt Signaling Pathway |                             | PI3K-Akt Signaling Pathway  |                           |
| Neurotransmitter release cycle                                          | Neurotransmitter release cycle                                          |                                                       |                                      |                                                            |                            |                             |                             |                           |
| Phosphodiesterases in neuronal function                                 | Phosphodiesterases in neuronal function                                 |                                                       |                                      | Phosphodiesterases in neuronal function                    |                            |                             |                             |                           |
| GABA receptor Signaling                                                 | GABA receptor Signaling                                                 |                                                       |                                      |                                                            |                            |                             |                             |                           |
| Acetylcholine synthesis                                                 | Neurotransmitter uptake and metabolism In glial cells                   | Neurotransmitter uptake and metabolism In glial cells |                                      |                                                            |                            |                             |                             |                           |
| Cannabinoid receptor signaling                                          | Acetylcholine binding and downstream events                             | Cannabinoid receptor signaling                        |                                      |                                                            |                            |                             |                             |                           |
| Nicotine Activity on Dopaminergic Neurons                               | Neurotransmitter clearance                                              | Nicotine Activity on Dopaminergic Neurons             |                                      |                                                            |                            |                             |                             |                           |

- 154
- 155
- 156
- 157
- 158
- 159
- 160
- 161

162 **Supplementary Table 4**

163 **Well-known cytokines and the receptors used for the analyses in our study**

| <b>Pro-inflammatory signaling</b>  |                                               |
|------------------------------------|-----------------------------------------------|
| <b>IL-1</b>                        | IL1A, IL1B, IL18, IL33, IL36A, IL36B          |
| <b>IL-6</b>                        | IL11, IL6R, CNTFR, CTF1, LIF, SPP1, OSM, OSMR |
| <b>TNF<math>\alpha</math></b>      | TNF, LTA, TNFSF13B, TNFSF13                   |
| <b>IL-17</b>                       | IL17A, IL17B, IL17C, IL17D, IL17F, IL25       |
| <b>IFN</b>                         | IFNB1, IFNAR1, IFNK, IFNL1                    |
| <b>C-C Motif chemokine</b>         | CCR2, CCL2                                    |
| <b>C-X-C Motif chemokine</b>       | CXCL12                                        |
| <b>Anti-inflammatory signaling</b> |                                               |
| <b>IL-12</b>                       | IL12RB1, IL12RB2, IL23R, IL23A, IL27          |
| <b>IL-10</b>                       | IL10, IL19, IL20, IL24, IL22, IL26            |
| <b>TGF<math>\beta</math></b>       | TGFB1, TGFBR1, TGFBR2, TGFBR3                 |
| <b>C-X-C Motif chemokine</b>       | CXCL11                                        |

164

165

166

167

168

169

170

171

172

173

174

175 **Supplementary Table 5**

176 **Summary of public GitHub repositories where R scripts were used for data analyses in our study**

| Name of the Repository                                                      | R packages                                                                     | URL                                                                                                                                                                                                                                                          |
|-----------------------------------------------------------------------------|--------------------------------------------------------------------------------|--------------------------------------------------------------------------------------------------------------------------------------------------------------------------------------------------------------------------------------------------------------|
| BenaroyaResearch/DGETools<br>eonurk/RNA-seq-differential-analyses-guideline | edgeR<br>Limma-Voom                                                            | <a href="https://github.com/BenaroyaResearch/DGETools">https://github.com/BenaroyaResearch/DGETools</a><br><a href="https://github.com/eonurk/RNA-seq-differential-analyses-guideline">https://github.com/eonurk/RNA-seq-differential-analyses-guideline</a> |
| satijalab/seurat                                                            | Seurat                                                                         | <a href="https://github.com/satijalab/seurat">https://github.com/satijalab/seurat</a>                                                                                                                                                                        |
| rikenbit/scTensor                                                           | LRBase.Ssc.eg.db<br>DropletUtils<br>scTGIF<br>SingleCellExperiment<br>scTensor | <a href="https://github.com/rikenbit/scTensor">https://github.com/rikenbit/scTensor</a>                                                                                                                                                                      |
| meichendong/SCDC                                                            | SCDC                                                                           | <a href="https://github.com/meichendong/SCDC">https://github.com/meichendong/SCDC</a>                                                                                                                                                                        |
| danny-wilson/harmonicmeanp                                                  | harmonicmeanp                                                                  | <a href="https://github.com/danny-wilson/harmonicmeanp">https://github.com/danny-wilson/harmonicmeanp</a>                                                                                                                                                    |
| ssayols/rrvgo                                                               | rrvgo                                                                          | <a href="https://github.com/ssayols/rrvgo/">https://github.com/ssayols/rrvgo/</a>                                                                                                                                                                            |

177

178

179

180

181

182

183

184

185

186
