# Supplementary material
Source: PubMed Central journal article supplement (PMC9873727)
Supplement: 42003_2023_4478_MOESM3_ESM.pdf [file 42003_2023_4478_MOESM3_ESM.pdf]

## Description of Additional Supplementary Files

**File name:** Supplementary Data 1

**Description:** The source data behind the Figure 2a in the paper.

**File name:** Supplementary Data 2

**Description:** The source data behind the Figure 7 in the paper.

**File name:** Supplementary Data 3

**Description:** The source data behind the Figure 8 in the paper.

**File name:** Supplementary Data 4

**Description:** Source data for Figure 4c.

**File name:** Supplementary Data 5

**Description:** Source data for Figure 4d.
